# Supplementary material for: One-step synthesis of novel poly(terephthalate-alt-benzoquinone) with high specific capacity as a stable organic cathode for Li-ion batteries
Source: Royal Society of Chemistry journal article supplement (doi:10.1039/c7nj03315j), 2017-01-01
Supplement: c7nj03315j1.pdf [file c7nj03315j1.pdf]

## Supporting information

### One-step Synthesis of Novel Poly(terephthalate-alt-benzoquinone) with High Specific Capacity as the Stable Organic Cathode in Li-ion Battery

Chao Li,<sup>a</sup> Haochen Tan,<sup>a</sup> Jingfang Pei,<sup>a</sup> Chuan Wang,<sup>a</sup> Cong Fan,<sup>\*a,d</sup> Fangyi Huang,<sup>a</sup> Bei Cao,<sup>\*b</sup> Minghui Hao<sup>c</sup>, Yuanxun Li,<sup>a</sup> Zhihong Wang<sup>a</sup> and Jingze Li<sup>\*a</sup>

<sup>a</sup> State Key Laboratory of Electronic Thin Films and Integrated Devices, School of Microelectronics and Solid-state Electronics, University of Electronic Science and Technology of China (UESTC), Chengdu 610054, P. R. China

<sup>b</sup> State Key Laboratory of Synthetic Chemistry, Institute of Molecular Functional Materials, Department of Chemistry, The University of Hong Kong, Hong Kong, P. R. China

<sup>c</sup> Hubei Collaborative Innovation Center for Advanced Organic Chemical Materials, Department of Chemistry, Wuhan University, Wuhan 430072, P. R. China

<sup>d</sup> Institute of Electronic and Information Engineering of UESTC in Guangdong, Dongguan 523000, P. R. China

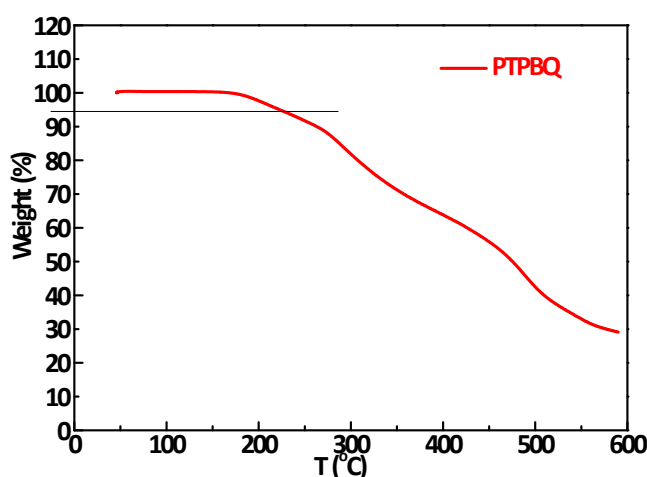

Fig. S1 The thermogravimetric analysis thermogram for PTPBQ.

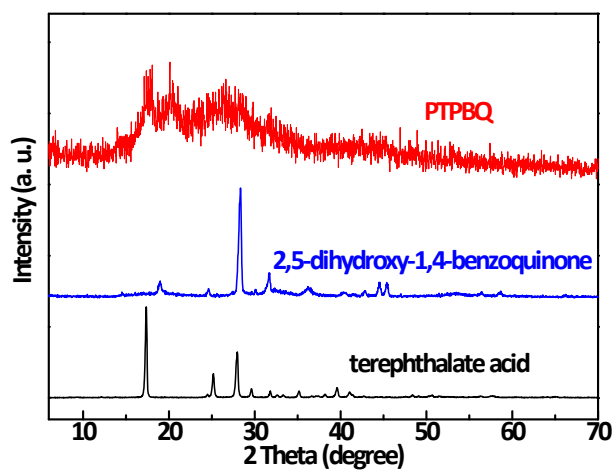

**Fig. S2** The XRD patterns of PTPBQ, terephthalate acid and 2,5-dihydroxy-1,4-benzoquinone (BQ).

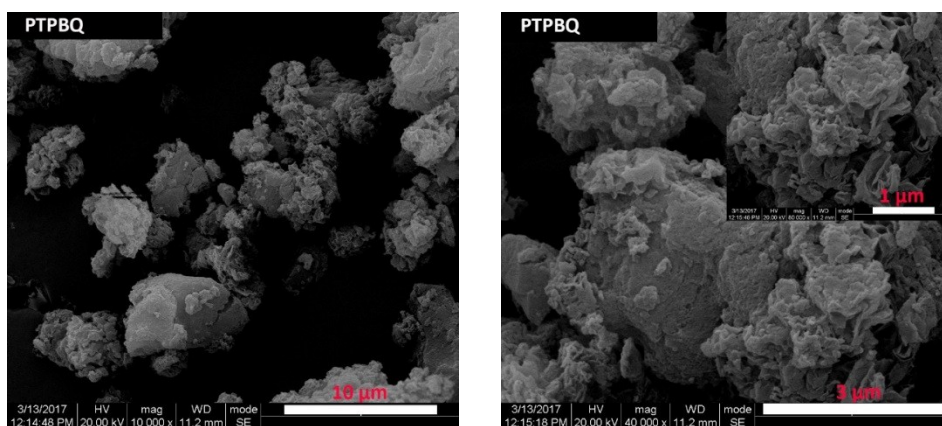

**Fig. S3** The SEM images for the neat PTPBQ particles without technical modification.

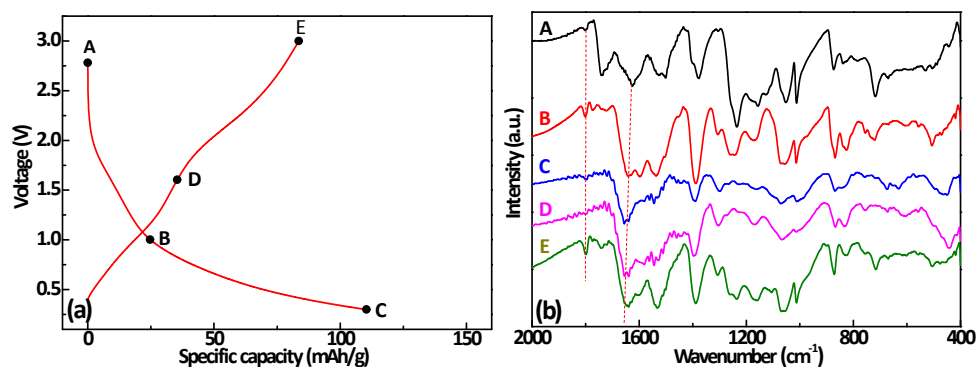

**Fig. S4** (a) The selected points in the discharge-charge cycle for the PTPBQ in Li-ion cell; (b) The *ex-situ* IR spectra of the PTPBQ at the related status during this cycle.

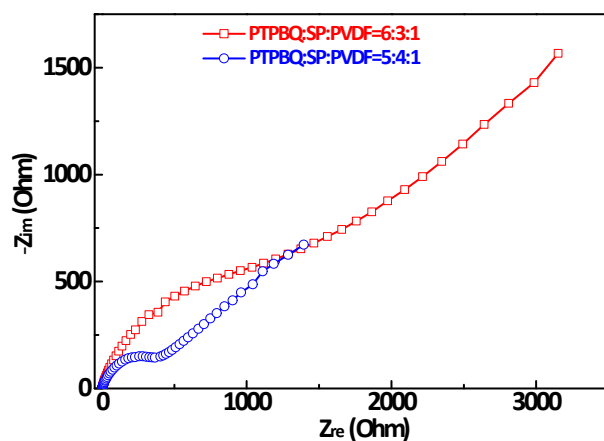

**Fig. S5.** The EIS plots for PTPBQ in Li-ion cells with different content at open-circuit voltage.

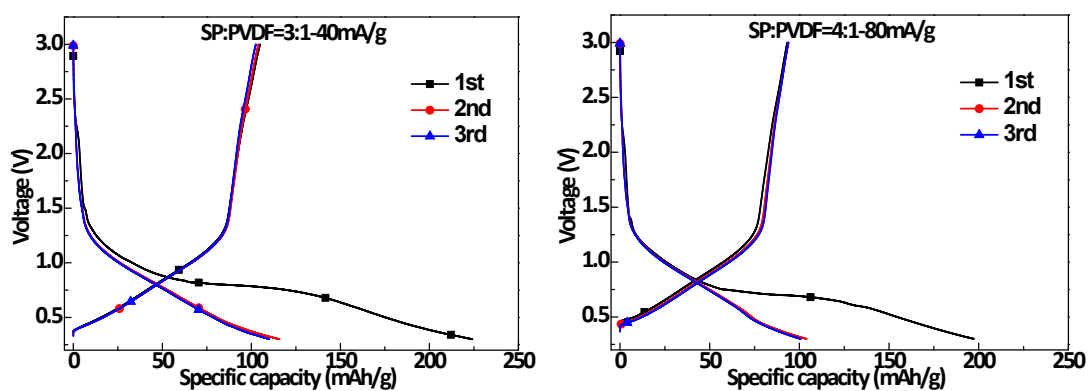

**Fig. S6.** The selected charge-discharge curves for the neat super P in Li-ion cells with different content.
